# Supplementary material for: Identifying neural substrates of competitive interactions and sequence transitions during mechanosensory responses in Drosophila
Source: PLoS Genet. 2020 Feb 14;16(2):e1008589. doi: 10.1371/journal.pgen.1008589 (PMC7173939; doi:10.1371/journal.pgen.1008589)
Supplement: S1 Table — (XLSX) [file pgen.1008589.s010.xlsx]

## Sheet: Sheet1
'EXT_iav-GAL4_UAS_TNT_2_0003'	0.489641	0.181508	0.125581	0.0177498	0.0465778	0	0.138942
'FCF_attP2_1500062_UAS_TNT_2_0003'	0.241124	0.297882	0.0335859	0.18481	0.0643988	2.95281e-05	0.17817
'GMR_10A09_AE_01_UAS_TNT_2_0003'	0.298215	0.364234	0.00455466	0.106367	0.0746688	0	0.15196
'GMR_10A11_AE_01_UAS_TNT_2_0003'	0.20122	0.373984	0.0142276	0.121951	0.144309	0	0.144309
'GMR_10A12_AE_01_UAS_TNT_2_0003'	0.138047	0.334175	0.016835	0.304714	0.023569	0	0.18266
'GMR_10B07_AE_01_UAS_TNT_2_0003'	0.382536	0.272349	0.0176715	0.037422	0.0925156	0.00935551	0.18815
'GMR_10C07_AE_01_UAS_TNT_2_0003'	0.27	0.259048	0.037619	0.0895238	0.15381	0	0.19
'GMR_10D09_AE_01_UAS_TNT_2_0003'	0.287001	0.272456	0.032457	0.0940847	0.104836	0	0.209165
'GMR_10E05_AE_01_UAS_TNT_2_0003'	0.29769	0.252487	0.0591015	0.115327	0.0902987	0	0.185096
'GMR_10E07_AE_01_UAS_TNT_2_0003'	0.252726	0.334242	0.00934579	0.153816	0.105919	0	0.143951
'GMR_10F08_AE_01_UAS_TNT_2_0003'	0.331909	0.257514	0.0111467	0.12136	0.0469373	0	0.231132
'GMR_10G02_AE_01_UAS_TNT_2_0003'	0.274598	0.360442	0.00753012	0.105924	0.064759	0	0.186747
'GMR_10H06_AE_01_UAS_TNT_2_0003'	0.365944	0.261396	0.0171449	0.0906085	0.121388	0	0.143519
'GMR_11A06_AE_01_UAS_TNT_2_0003'	0.269345	0.261905	0.0230655	0.124256	0.145833	0	0.175595
'GMR_11A07_AE_01_UAS_TNT_2_0003'	0.0305128	0.278077	0.00615385	0.460577	0.0335897	0	0.19109
'GMR_11B01_AE_01_UAS_TNT_2_0003'	0.316335	0.260229	0.0190075	0.109995	0.112514	0	0.18192
'GMR_11B07_AE_01_UAS_TNT_2_0003'	0.247139	0.229392	0.011708	0.143833	0.146959	0	0.220968
'GMR_11B11_AE_01_UAS_TNT_2_0003'	0.201863	0.271094	0.0061911	0.180145	0.139601	0	0.201107
'GMR_11F02_AE_01_UAS_TNT_2_0003'	0.187306	0.359327	0.0119048	0.145323	0.111158	0	0.184982
'GMR_11F06_AE_01_UAS_TNT_2_0003'	0.242574	0.478548	0.00907591	0.0371287	0.0990099	0	0.133663
'GMR_11H11_AE_01_UAS_TNT_2_0003'	0.388808	0.193026	0.0382848	0.104768	0.0689883	0	0.206125
'GMR_12A02_AE_01_UAS_TNT_2_0003'	0.376821	0.232462	0.0146667	0.0837436	0.103231	0	0.189077
'GMR_12A10_AE_01_UAS_TNT_2_0003'	0.325203	0.304426	0.00948509	0.166667	0.0623306	0	0.131888
'GMR_12F01_AE_01_UAS_TNT_2_0003'	0.0583554	0.366048	0.00530504	0.228117	0.0371353	0	0.30504
'GMR_12F10_AE_01_UAS_TNT_2_0003'	0.230769	0.262664	0	0.142589	0.245779	0	0.118199
'GMR_13A08_AE_01_UAS_TNT_2_0003'	0.424897	0.0925926	0.0473251	0.131687	0.102881	0	0.200617
'GMR_13B06_AE_01_UAS_TNT_2_0003'	0.258112	0.368732	0.0176991	0.117994	0.113569	0	0.123894
'GMR_13B11_AE_01_UAS_TNT_2_0003'	0.249234	0.32792	0.0149593	0.159749	0.0728679	0.000429553	0.17484
'GMR_13E09_AE_01_UAS_TNT_2_0003'	0.303077	0.349231	0.0369231	0.0753846	0.103077	0	0.132308
'GMR_13G10_AE_01_UAS_TNT_2_0003'	0.332834	0.14567	0.0267926	0.224397	0.0647167	0	0.205589
'GMR_13G12_AE_01_UAS_TNT_2_0003'	0.262108	0.289886	0.0491453	0.0626781	0.0997151	0	0.236467
'GMR_14A02_AE_01_UAS_TNT_2_0003'	0.338542	0.205208	0.034375	0.0822917	0.0854167	0	0.254167
'GMR_14A11_AE_01_UAS_TNT_2_0003'	0.308933	0.222084	0.0136476	0.110422	0.184864	0	0.16005
'GMR_14C10_AE_01_UAS_TNT_2_0003'	0.311992	0.220137	0.0245083	0.0868088	0.159227	0	0.197328
'GMR_14F10_AE_01_UAS_TNT_2_0003'	0.397249	0.258238	0.0353045	0.0440571	0.114225	0	0.150927
'GMR_15A04_AE_01_UAS_TNT_2_0003'	0.309701	0.26306	0.0366915	0.121269	0.0858209	0	0.183458
'GMR_15B07_AE_01_UAS_TNT_2_0003'	0.176997	0.240358	0.0144628	0.285813	0.153581	0	0.128788
'GMR_15E08_AE_01_UAS_TNT_2_0003'	0.234359	0.261538	0.0276557	0.078022	0.164652	0	0.233773
'GMR_15F02_AE_01_UAS_TNT_2_0003'	0.147436	0.410947	0.0668639	0.245168	0.00118343	0	0.128402
'GMR_15F05_AE_01_UAS_TNT_2_0003'	0.326389	0.264015	0.00277778	0.104167	0.193056	0	0.109596
'GMR_15F12_AE_01_UAS_TNT_2_0003'	0.247375	0.23622	0.015748	0.127297	0.163386	0	0.209974
'GMR_15G08_AE_01_UAS_TNT_2_0003'	0.286508	0.263095	0.0130952	0.159524	0.0816327	0	0.196145
'GMR_15G09_AE_01_UAS_TNT_2_0003'	0.353365	0.132212	0.0264423	0.03125	0.286058	0	0.170673
'GMR_16A05_AE_01_UAS_TNT_2_0003'	0.408915	0.222868	0.00968992	0.0697674	0.0368217	0	0.251938
'GMR_16B02_AE_01_UAS_TNT_2_0003'	0.245937	0.299813	0.0585049	0.114843	0.0574215	0	0.223481
'GMR_16B04_AE_01_UAS_TNT_2_0003'	0.344274	0.215394	0.0691151	0.125313	0.0702718	0	0.175631
'GMR_16C09_AE_01_UAS_TNT_2_0003'	0.341374	0.294956	0.0164474	0.128655	0.0844298	0	0.134137
'GMR_16D01_AE_01_UAS_TNT_2_0003'	0.315385	0.202564	0.0205128	0.107692	0.142949	0	0.210897
'GMR_16D02_AE_01_UAS_TNT_2_0003'	0.261623	0.245559	0.0310086	0.157553	0.114844	0	0.189411
'GMR_16D11_AE_01_UAS_TNT_2_0003'	0.308454	0.286232	0.00241546	0.126812	0.111111	0	0.164976
'GMR_16D12_AE_01_UAS_TNT_2_0003'	0.362637	0.202198	0.0285714	0.0725275	0.149451	0	0.184615
'GMR_16E03_AE_01_UAS_TNT_2_0003'	0.364161	0.203034	0.183417	0.022001	0.0393635	0	0.188023
'GMR_16E07_AE_01_UAS_TNT_2_0003'	0.381657	0.22742	0.0736563	0.0739029	0.0827991	0	0.160565
'GMR_16E12_AE_01_UAS_TNT_2_0003'	0.4	0.205769	0.0318681	0.148352	0.0615385	0	0.152473
'GMR_16F06_AE_01_UAS_TNT_2_0003'	0.364328	0.30093	0.0253593	0.06847	0.0642434	0	0.176669
'GMR_16G10_AE_01_UAS_TNT_2_0003'	0.215986	0.306122	0.0221088	0.0816327	0.141156	0	0.232993
'GMR_17A03_AE_01_UAS_TNT_2_0003'	0.245712	0.247	0.00365478	0.155094	0.132741	0	0.215797
'GMR_17A11_AE_01_UAS_TNT_2_0003'	0.207892	0.260863	0.0789703	0.107733	0.078612	0	0.26593
'GMR_17B10_AE_01_UAS_TNT_2_0003'	0.530638	0.230403	0.0825157	0.00455259	0.0263082	0	0.125582
'GMR_17B12_AE_01_UAS_TNT_2_0003'	0.313679	0.395873	0.0248596	0.0374947	0.106127	0.00137741	0.12059
'GMR_17C02_AE_01_UAS_TNT_2_0003'	0.328526	0.250702	0.0138889	0.126068	0.0628053	0	0.21801
'GMR_17C10_AE_01_UAS_TNT_2_0003'	0.297412	0.320634	0.167392	0.0442671	0.0217707	0	0.148524
'GMR_17F01_AE_01_UAS_TNT_2_0003'	0.27154	0.34688	0.0730527	0.0615627	0.0827286	0	0.164237
'GMR_17F10_AE_01_UAS_TNT_2_0003'	0.563313	0.247689	0.0485998	0.0121161	0.0320485	0.00114172	0.095092
'GMR_17G06_AE_01_UAS_TNT_2_0003'	0.423411	0.259084	0.0495222	0.0650464	0.0551164	0.00306748	0.144752
'GMR_18A10_AE_01_UAS_TNT_2_0003'	0.5	0.108025	0.0123457	0.0462963	0.166667	0	0.166667
'GMR_18B11_AE_01_UAS_TNT_2_0003'	0.328514	0.224474	0.0213292	0.203978	0.0749971	0	0.146708
'GMR_18D09_AE_01_UAS_TNT_2_0003'	0.521687	0.201501	0.0346614	0.0325695	0.0384999	0	0.171081
'GMR_18E11_AE_01_UAS_TNT_2_0003'	0.259036	0.31569	0.00100402	0.108616	0.11496	0	0.200694
'GMR_18E12_AE_01_UAS_TNT_2_0003'	0.336138	0.242531	0.0331387	0.0997882	0.106656	0	0.181748
'GMR_18F10_AE_01_UAS_TNT_2_0003'	0.207407	0.283333	0.0037037	0.205556	0.122222	0	0.177778
'GMR_18G08_AE_01_UAS_TNT_2_0003'	0.319068	0.257343	0.0614219	0.07669	0.0713287	0	0.214149
'GMR_18H11_AE_01_UAS_TNT_2_0003'	0.263883	0.192706	0.0555334	0.177063	0.0999734	0	0.210841
'GMR_19E04_AE_01_UAS_TNT_2_0003'	0.256536	0.316176	0.0236928	0.195261	0.0465686	0	0.161765
'GMR_19E12_AE_01_UAS_TNT_2_0003'	0.298351	0.320136	0	0.161559	0.0573152	0	0.162639
'GMR_19F06_AE_01_UAS_TNT_2_0003'	0.315013	0.212213	0.0192982	0.0852227	0.198043	0	0.170209
'GMR_19F12_AE_01_UAS_TNT_2_0003'	0.360224	0.255704	0.055465	0.0623642	0.079585	0	0.186658
'GMR_19G03_AE_01_UAS_TNT_2_0003'	0.277265	0.240214	0.00722222	0.187009	0.101453	0	0.186838
'GMR_19H06_AE_01_UAS_TNT_2_0003'	0.323633	0.148854	0.0170751	0.204164	0.137225	0	0.169049
'GMR_20A06_AE_01_UAS_TNT_2_0003'	0.19898	0.331633	0.0042517	0.193027	0.0943878	0	0.177721
'GMR_20C06_AE_01_UAS_TNT_2_0003'	0.192661	0.423861	0.0387598	0.0884516	0.0433533	0	0.212914
'GMR_20C08_AE_01_UAS_TNT_2_0003'	0.243481	0.257859	0.023287	0.145987	0.0838041	0	0.245582
'GMR_20D06_AE_01_UAS_TNT_2_0003'	0.447616	0.198025	0.0888525	0.0389804	0.0605572	0	0.165968
'GMR_20E02_AE_01_UAS_TNT_2_0003'	0.339254	0.233852	0.0450675	0.100215	0.0857311	0	0.19588
'GMR_20F11_AE_01_UAS_TNT_2_0003'	0.182902	0.294183	0.0142343	0.223217	0.0962089	0	0.189255
'GMR_20G01_AE_01_UAS_TNT_2_0003'	0.270983	0.315496	0.0532197	0.110806	0.0556219	0	0.193874
'GMR_20G04_AE_01_UAS_TNT_2_0003'	0.16447	0.292317	0.0028241	0.299758	0.063206	0	0.177425
'GMR_20G06_AE_01_UAS_TNT_2_0003'	0.312731	0.275306	0.0281426	0.124631	0.0662468	0	0.192943
'GMR_20G07_AE_01_UAS_TNT_2_0003'	0.194069	0.279515	0.0359256	0.219076	0.0137363	0	0.257678
'GMR_20H08_AE_01_UAS_TNT_2_0003'	0.391083	0.206715	0.0346959	0.0979936	0.0945728	0	0.17494
'GMR_21A03_AE_01_UAS_TNT_2_0003'	0.343654	0.181987	0.0714744	0.0996795	0.0721154	0	0.23109
'GMR_21B02_AE_01_UAS_TNT_2_0003'	0.219444	0.380556	0.0166667	0.102778	0.125	0	0.155556
'GMR_21C12_AE_01_UAS_TNT_2_0003'	0.201282	0.280726	0.0475367	0.112187	0.0570441	0	0.301224
'GMR_21D05_AE_01_UAS_TNT_2_0003'	0.24637	0.194886	0.0309421	0.161726	0.133348	0	0.232728
'GMR_21D09_AE_01_UAS_TNT_2_0003'	0.257477	0.327151	0.037265	0.0736467	0.0998006	0.00407407	0.200586
'GMR_21E09_AE_01_UAS_TNT_2_0003'	0.429926	0.308746	0.0052687	0.0621707	0.0748156	0.00210748	0.116965
'GMR_21F09_AE_01_UAS_TNT_2_0003'	0.185554	0.355671	0.0260417	0.205185	0.0511103	0	0.176437
'GMR_21G04_AE_01_UAS_TNT_2_0003'	0.300676	0.214715	0.0131381	0.0945946	0.171922	0	0.204955
'GMR_22C06_AE_01_UAS_TNT_2_0003'	0.392337	0.251639	0.0555798	0.0312136	0.100379	0	0.168852
'GMR_22D04_AE_01_UAS_TNT_2_0003'	0.340897	0.187545	0.0550427	0.149103	0.0736325	0	0.19378
'GMR_22D08_AE_01_UAS_TNT_2_0003'	0.244665	0.233357	0.0310161	0.114748	0.17881	0	0.197404
'GMR_22D11_AE_01_UAS_TNT_2_0003'	0.218876	0.365462	0.00803213	0.116466	0.113454	0	0.177711
'GMR_22E09_AE_01_UAS_TNT_2_0003'	0.279514	0.275174	0.0173611	0.130208	0.118056	0	0.179688
'GMR_22G12_AE_01_UAS_TNT_2_0003'	0.489712	0.152263	0.026749	0.00617284	0.152263	0	0.17284
'GMR_22H02_AE_01_UAS_TNT_2_0003'	0.479167	0.275568	0.0246212	0.0473485	0.032197	0	0.141098
'GMR_23A05_AE_01_UAS_TNT_2_0003'	0.27574	0.294675	0.0130178	0.0331361	0.213018	0	0.170414
'GMR_23D10_AE_01_UAS_TNT_2_0003'	0.437229	0.181277	0.0119048	0.086039	0.148268	0	0.135281
'GMR_23E10_AE_01_UAS_TNT_2_0003'	0.257444	0.255583	0.00620347	0.168734	0.110422	0	0.201613
'GMR_23F01_AE_01_UAS_TNT_2_0003'	0.452797	0.149873	0	0.0773999	0.103147	0	0.216783
'GMR_23F06_AE_01_UAS_TNT_2_0003'	0.225456	0.264033	0.002079	0.181913	0.128898	0	0.197621
'GMR_23G02_AE_01_UAS_TNT_2_0003'	0.429921	0.277232	0.13635	0.00433777	0.0137363	0	0.138423
'GMR_23G11_AE_01_UAS_TNT_2_0003'	0.459495	0.189252	0.0135525	0.0818546	0.0727974	0	0.183049
'GMR_24A10_AE_01_UAS_TNT_2_0003'	0.208333	0.347756	0	0.152244	0.0689103	0	0.222756
'GMR_24F10_AE_01_UAS_TNT_2_0003'	0.116279	0.296959	0.00357782	0.363148	0.0483005	0	0.171735
'GMR_24G01_AE_01_UAS_TNT_2_0003'	0.181027	0.264317	0.00594471	0.28304	0.0691878	0	0.196483
'GMR_24G12_AE_01_UAS_TNT_2_0003'	0.348974	0.199231	0.0127692	0.119744	0.105641	0	0.213641
'GMR_24H12_AE_01_UAS_TNT_2_0003'	0.425758	0.254545	0.019697	0.124242	0.0515152	0	0.124242
'GMR_25A08_AE_01_UAS_TNT_2_0003'	0.404162	0.15115	0.00657174	0.075575	0.105148	0	0.257393
'GMR_25B07_AE_01_UAS_TNT_2_0003'	0.147222	0.363889	0.0625	0.122222	0.141667	0	0.1625
'GMR_25D12_AE_01_UAS_TNT_2_0003'	0.29585	0.249609	0.0108142	0.161487	0.131533	0	0.150707
'GMR_25E05_AE_01_UAS_TNT_2_0003'	0.453537	0.212077	0.055659	0.0550442	0.0600598	0	0.163623
'GMR_25F10_AE_01_UAS_TNT_2_0003'	0.07	0.372727	0.00833333	0.368939	0.0233333	0	0.156667
'GMR_25G08_AE_01_UAS_TNT_2_0003'	0.491667	0.229167	0.0916667	0	0	0	0.1875
'GMR_25H02_AE_01_UAS_TNT_2_0003'	0.420188	0.179577	0.00469484	0.056338	0.110329	0	0.228873
'GMR_26A08_AE_01_UAS_TNT_2_0003'	0.400906	0.25186	0.0170455	0.0935133	0.0814056	0	0.155269
'GMR_26D07_AE_01_UAS_TNT_2_0003'	0.331469	0.234965	0.0433566	0.0853147	0.184615	0	0.12028
'GMR_26D12_AE_01_UAS_TNT_2_0003'	0.274694	0.215891	0.0469478	0.125947	0.103693	0	0.232827
'GMR_26F10_AE_01_UAS_TNT_2_0003'	0.0958333	0.208333	0.025	0.402083	0.1	0	0.16875
'GMR_26H06_AE_01_UAS_TNT_2_0003'	0.291943	0.215784	0.0286976	0.151214	0.0756071	0	0.236755
'GMR_27A02_AE_01_UAS_TNT_2_0003'	0.395139	0.191592	0.0383974	0.131912	0.101581	0	0.141378
'GMR_27B07_AE_01_UAS_TNT_2_0003'	0.341898	0.284614	0.0142165	0.0970214	0.072885	0	0.189365
'GMR_27B12_AE_01_UAS_TNT_2_0003'	0.313958	0.426981	0.0167727	0.0572585	0.0382206	0	0.146809
'GMR_27C05_AE_01_UAS_TNT_2_0003'	0.452982	0.21435	0.0325092	0.0351419	0.0587798	0	0.206237
'GMR_27D02_AE_01_UAS_TNT_2_0003'	0.269366	0.18662	0.0266041	0.174296	0.0721831	0	0.270931
'GMR_27D10_AE_01_UAS_TNT_2_0003'	0.139683	0.364286	0.0293651	0.252381	0.0531746	0	0.161111
'GMR_27H02_AE_01_UAS_TNT_2_0003'	0.319224	0.285613	0.00454484	0.116368	0.0423959	0	0.231855
'GMR_27H06_AE_01_UAS_TNT_2_0003'	0.214676	0.241667	0.0280702	0.192578	0.123104	0	0.199906
'GMR_28A05_AE_01_UAS_TNT_2_0003'	0.230676	0.295894	0.00362319	0.101449	0.146135	0.013285	0.208937
'GMR_28E02_AE_01_UAS_TNT_2_0003'	0.32655	0.296159	0.0509161	0.0340909	0.148784	0	0.143499
'GMR_28E11_AE_01_UAS_TNT_2_0003'	0.344086	0.260753	0.0483871	0.0430108	0.110215	0	0.193548
'GMR_29B04_AE_01_UAS_TNT_2_0003'	0.248821	0.260094	0.033967	0.169319	0.0951223	0	0.192676
'GMR_29C10_AE_01_UAS_TNT_2_0003'	0.484709	0.182729	0.0466747	0.111111	0.0201656	0	0.154611
'GMR_29D10_AE_01_UAS_TNT_2_0003'	0.232601	0.326007	0	0.157509	0.0842491	0	0.199634
'GMR_29D11_AE_01_UAS_TNT_2_0003'	0.302	0.267333	0.00933333	0.092	0.151333	0	0.178
'GMR_29E11_AE_01_UAS_TNT_2_0003'	0.431357	0.16134	0.0157616	0.117628	0.0946545	0	0.17926
'GMR_29G02_AE_01_UAS_TNT_2_0003'	0.379695	0.197343	0.0192061	0.123239	0.0984315	0	0.182085
'GMR_30A04_AE_01_UAS_TNT_2_0003'	0.272138	0.284211	0.010011	0.138167	0.130732	0	0.164741
'GMR_30A08_AE_01_UAS_TNT_2_0003'	0.244928	0.285507	0.0413043	0.121014	0.128986	0	0.178261
'GMR_30A09_AE_01_UAS_TNT_2_0003'	0.446212	0.300673	0.0272727	0.0171717	0.0575758	0	0.151094
'GMR_30B11_AE_01_UAS_TNT_2_0003'	0.232645	0.289532	0.00165289	0.126887	0.176074	0	0.173209
'GMR_30D11_AE_01_UAS_TNT_2_0003'	0.220428	0.366655	0.00870827	0.14417	0.0765602	0.00393082	0.179548
'GMR_30E03_AE_01_UAS_TNT_2_0003'	0.302555	0.278237	0.0347165	0.103253	0.0877217	0	0.193516
'GMR_30E06_AE_01_UAS_TNT_2_0003'	0.151361	0.152494	0.0102041	0.202381	0.204082	0	0.279478
'GMR_30E09_AE_01_UAS_TNT_2_0003'	0.367412	0.208032	0.043913	0.132616	0.0529805	0	0.195047
'GMR_30H09_AE_01_UAS_TNT_2_0003'	0.545485	0.214151	0.0981262	0.0203236	0.012474	0	0.109441
'GMR_31A05_AE_01_UAS_TNT_2_0003'	0.396878	0.144928	0.0230132	0.126254	0.0804268	0	0.2285
'GMR_31B07_AE_01_UAS_TNT_2_0003'	0.315089	0.306213	0	0.0576923	0.0872781	0	0.233728
'GMR_31E06_AE_01_UAS_TNT_2_0003'	0.422246	0.208554	0.030001	0.0914045	0.0615333	0	0.186261
'GMR_31E11_AE_01_UAS_TNT_2_0003'	0.302002	0.126188	0.117113	0.100115	0.10206	0	0.252521
'GMR_31F03_AE_01_UAS_TNT_2_0003'	0.244253	0.359195	0.0186782	0.114943	0.045977	0	0.216954
'GMR_31F10_AE_01_UAS_TNT_2_0003'	0.426136	0.219223	0.0208333	0.0752841	0.129477	0	0.129046
'GMR_31G02_AE_01_UAS_TNT_2_0003'	0.242157	0.344118	0.0421569	0.0764706	0.0480392	0	0.247059
'GMR_31G11_AE_01_UAS_TNT_2_0003'	0.196825	0.270635	0.0253968	0.236508	0.0698413	0	0.200794
'GMR_31H12_AE_01_UAS_TNT_2_0003'	0.447485	0.18713	0.00918393	0.051467	0.159702	0	0.145032
'GMR_32A04_AE_01_UAS_TNT_2_0003'	0.348009	0.283213	0.00950226	0.107828	0.0985973	0	0.152851
'GMR_32B12_AE_01_UAS_TNT_2_0003'	0.356027	0.258498	0.00910062	0.0862315	0.0897047	0	0.200438
'GMR_32E03_AE_01_UAS_TNT_2_0003'	0.372929	0.230666	0.0170184	0.0820286	0.130191	0	0.167167
'GMR_32E04_AE_01_UAS_TNT_2_0003'	0.0921053	0.284413	0.00708502	0.220648	0.230769	0	0.16498
'GMR_32E05_AE_01_UAS_TNT_2_0003'	0.441169	0.104481	0.0136592	0.0596094	0.136353	0	0.244728
'GMR_32F07_AE_01_UAS_TNT_2_0003'	0.334762	0.225857	0.0397506	0.107058	0.120123	0	0.17245
'GMR_32G08_AE_01_UAS_TNT_2_0003'	0.244048	0.330357	0.0357143	0.0416667	0.142857	0	0.205357
'GMR_32H08_AE_01_UAS_TNT_2_0003'	0.350271	0.270377	0.0219929	0.0666041	0.0610277	0	0.229727
'GMR_33A07_AE_01_UAS_TNT_2_0003'	0.395995	0.220284	0.0652455	0.0691214	0.0568475	0	0.192506
'GMR_33D04_AE_01_UAS_TNT_2_0003'	0.12678	0.420587	0.00387382	0.128993	0.123107	0	0.196659
'GMR_33F10_AE_01_UAS_TNT_2_0003'	0.346056	0.244911	0.0451654	0.0706107	0.0833333	0	0.209924
'GMR_33H12_AE_01_UAS_TNT_2_0003'	0.286921	0.243343	0.0498028	0.0803748	0.121795	0	0.217764
'GMR_34A10_AE_01_UAS_TNT_2_0003'	0.11809	0.281607	0.00177857	0.349489	0.0967838	0	0.152253
'GMR_34D08_AE_01_UAS_TNT_2_0003'	0.444653	0.214196	0.0178236	0.136413	0.0445591	0	0.142355
'GMR_34G01_AE_01_UAS_TNT_2_0003'	0.262684	0.282551	0.005501	0.161075	0.125023	0.0070922	0.156074
'GMR_34G06_AE_01_UAS_TNT_2_0003'	0.313708	0.313615	0.00668896	0.0695606	0.154357	0	0.142071
'GMR_34H04_AE_01_UAS_TNT_2_0003'	0.307548	0.296737	0.0233599	0.101658	0.0751565	0.00187688	0.193663
'GMR_35B09_AE_01_UAS_TNT_2_0003'	0.360706	0.255474	0.0107751	0.0656934	0.107664	0	0.199687
'GMR_35E02_AE_01_UAS_TNT_2_0003'	0.238304	0.256579	0.0160819	0.185673	0.0522661	0	0.251096
'GMR_35G04_AE_01_UAS_TNT_2_0003'	0.355191	0.198087	0.0382514	0.128415	0.143443	0	0.136612
'GMR_36B02_AE_01_UAS_TNT_2_0003'	0.215125	0.288576	0.05712	0.215766	0.0438416	0	0.179571
'GMR_36B03_AE_01_UAS_TNT_2_0003'	0.30609	0.321886	0.0237637	0.0695513	0.0665751	0	0.212134
'GMR_36B06_AE_01_UAS_TNT_2_0003'	0.445341	0.153044	0.0323934	0.22236	0.0207379	0	0.126124
'GMR_36C01_AE_01_UAS_TNT_2_0003'	0.306245	0.323572	0.0170455	0.0755148	0.112908	0	0.164714
'GMR_36C12_AE_01_UAS_TNT_2_0003'	0.251337	0.180036	0.0320856	0.130125	0.229947	0	0.176471
'GMR_36E08_AE_01_UAS_TNT_2_0003'	0.433133	0.339038	0.054693	0.0271701	0.0141143	0	0.131851
'GMR_36F08_AE_01_UAS_TNT_2_0003'	0.383891	0.221006	0.0162268	0.100579	0.059838	0	0.218458
'GMR_36G02_AE_01_UAS_TNT_2_0003'	0.332418	0.280678	0.0208333	0.0862523	0.13948	0	0.140339
'GMR_36G04_AE_01_UAS_TNT_2_0003'	0.274134	0.338422	0.00515464	0.0894132	0.0356199	0	0.257256
'GMR_36H01_AE_01_UAS_TNT_2_0003'	0.239544	0.212016	0.00654664	0.212448	0.117794	0	0.211652
'GMR_36H03_AE_01_UAS_TNT_2_0003'	0.358074	0.154959	0.00484743	0.145582	0.117212	0	0.219326
'GMR_36H06_AE_01_UAS_TNT_2_0003'	0.36553	0.147727	0	0.109848	0.094697	0	0.282197
'GMR_37A07_AE_01_UAS_TNT_2_0003'	0.360417	0.3625	0.0583333	0	0.06875	0	0.15
'GMR_37C07_AE_01_UAS_TNT_2_0003'	0.316829	0.248674	0.0135573	0.0877174	0.137526	0	0.195697
'GMR_37C09_AE_01_UAS_TNT_2_0003'	0.294444	0.320887	0	0.0911325	0.0943376	0	0.199199
'GMR_37C11_AE_01_UAS_TNT_2_0003'	0.309028	0.282407	0.0162037	0.0810185	0.111111	0	0.200231
'GMR_37C12_AE_01_UAS_TNT_2_0003'	0.318854	0.271569	0.0190799	0.147878	0.0714932	0	0.171127
'GMR_37D06_AE_01_UAS_TNT_2_0003'	0.385027	0.283422	0.0013369	0.065508	0.112299	0	0.152406
'GMR_37F01_AE_01_UAS_TNT_2_0003'	0.140419	0.25521	0	0.244023	0.15991	0	0.200438
'GMR_37F03_AE_01_UAS_TNT_2_0003'	0.36808	0.19524	0.0934254	0.0746548	0.0463511	0	0.222249
'GMR_37F04_AE_01_UAS_TNT_2_0003'	0.37388	0.182354	0.0456014	0.138785	0.0633729	0	0.196008
'GMR_37F06_AE_01_UAS_TNT_2_0003'	0.183388	0.328619	0.0209605	0.182709	0.0812983	0	0.203025
'GMR_37G08_AE_01_UAS_TNT_2_0003'	0.197947	0.347696	0.0218816	0.203473	0.0512821	0.0018797	0.17584
'GMR_38A07_AE_01_UAS_TNT_2_0003'	0.326211	0.25641	0	0.0541311	0.249288	0	0.11396
'GMR_38A10_AE_01_UAS_TNT_2_0003'	0.286878	0.262381	0.0212451	0.117082	0.142343	0	0.170071
'GMR_38B03_AE_01_UAS_TNT_2_0003'	0.343254	0.208333	0.0297619	0.144841	0.0515873	0	0.222222
'GMR_38B08_AE_01_UAS_TNT_2_0003'	0.445988	0.203704	0.0601852	0.0478395	0.0185185	0	0.223765
'GMR_38B11_AE_01_UAS_TNT_2_0003'	0.367208	0.207339	0.000718391	0.0961538	0.132792	0	0.195789
'GMR_38D07_AE_01_UAS_TNT_2_0003'	0.203821	0.219161	0.00656972	0.260652	0.120551	0	0.189246
'GMR_38D09_AE_01_UAS_TNT_2_0003'	0.172101	0.365942	0	0.125	0.164855	0.00905797	0.163043
'GMR_38E08_AE_01_UAS_TNT_2_0003'	0.231379	0.378373	0	0.205191	0.078378	0	0.106679
'GMR_38F04_AE_01_UAS_TNT_2_0003'	0.297009	0.168803	0.00213675	0.188034	0.0790598	0	0.264957
'GMR_38G03_AE_01_UAS_TNT_2_0003'	0.231818	0.241667	0.00378788	0.194697	0.168182	0	0.159848
'GMR_38H10_AE_01_UAS_TNT_2_0003'	0.262664	0.429644	0.0412758	0.0337711	0.106942	0	0.125704
'GMR_39B12_AE_01_UAS_TNT_2_0003'	0.213277	0.293079	0.0268362	0.24435	0.0600282	0	0.162429
'GMR_39D01_AE_01_UAS_TNT_2_0003'	0.318376	0.275641	0.0982906	0	0.0790598	0.00213675	0.226496
'GMR_39D09_AE_01_UAS_TNT_2_0003'	0.191756	0.232298	0.0240703	0.217397	0.0743335	0	0.260146
'GMR_39E02_AE_01_UAS_TNT_2_0003'	0.210205	0.292462	0.022	0.125897	0.166051	0	0.183385
'GMR_39F05_AE_01_UAS_TNT_2_0003'	0.521368	0.191239	0.0117521	0.0202991	0.100427	0	0.154915
'GMR_39G09_AE_01_UAS_TNT_2_0003'	0.250663	0.254587	0.0706233	0.130029	0.130195	0	0.163904
'GMR_39H05_AE_01_UAS_TNT_2_0003'	0.127391	0.338128	0.00998423	0.275883	0.0615334	0	0.18708
'GMR_40A07_AE_01_UAS_TNT_2_0003'	0.453428	0.208242	0.0497907	0.0702773	0.0538462	0	0.164417
'GMR_40C04_AE_01_UAS_TNT_2_0003'	0.384756	0.201668	0.0230769	0.0898811	0.141142	0	0.159476
'GMR_40D07_AE_01_UAS_TNT_2_0003'	0.371795	0.224359	0.0496795	0.0849359	0.0865385	0	0.182692
'GMR_40F03_AE_01_UAS_TNT_2_0003'	0.244444	0.242593	0.0037037	0.157407	0.112037	0	0.239815
'GMR_40F04_AE_01_UAS_TNT_2_0003'	0.268437	0.255162	0.0169617	0.108407	0.122419	0	0.228614
'GMR_40F05_AE_01_UAS_TNT_2_0003'	0.232517	0.286713	0	0.0629371	0.277972	0	0.13986
'GMR_40F07_AE_01_UAS_TNT_2_0003'	0.417935	0.193777	0.0264423	0.0656384	0.0560897	0	0.240118
'GMR_41D01_AE_01_UAS_TNT_2_0003'	0.510135	0.258533	0.0143798	0.037552	0.0777027	0	0.101698
'GMR_41E11_AE_01_UAS_TNT_2_0003'	0.21333	0.349611	0.0395341	0.0741975	0.116432	0	0.206895
'GMR_42B08_AE_01_UAS_TNT_2_0003'	0.272101	0.196326	0.00229621	0.180253	0.205511	0	0.143513
'GMR_42C07_AE_01_UAS_TNT_2_0003'	0.26776	0.307377	0.00273224	0.0642077	0.187158	0.00409836	0.166667
'GMR_42G07_AE_01_UAS_TNT_2_0003'	0.116667	0.333333	0.0166667	0.122222	0.238889	0	0.172222
'GMR_42H01_AE_01_UAS_TNT_2_0003'	0.195426	0.409563	0	0.0831601	0.029106	0	0.282744
'GMR_43D05_AE_01_UAS_TNT_2_0003'	0.177622	0.420699	0.0041958	0.174825	0.0685315	0	0.154126
'GMR_44B05_AE_01_UAS_TNT_2_0003'	0.260355	0.260355	0.0295858	0.0946746	0.0769231	0	0.278107
'GMR_44C01_AE_01_UAS_TNT_2_0003'	0.181162	0.309771	0.0232733	0.248556	0.103546	0	0.133691
'GMR_44G02_AE_01_UAS_TNT_2_0003'	0.267677	0.295455	0.0138889	0.123737	0.147727	0	0.151515
'GMR_44G12_AE_01_UAS_TNT_2_0003'	0.266968	0.236928	0.033811	0.128394	0.16145	0	0.172448
'GMR_44H08_AE_01_UAS_TNT_2_0003'	0.384181	0.295344	0.0703698	0.0361377	0.0724059	0	0.141562
'GMR_45B08_AE_01_UAS_TNT_2_0003'	0.382943	0.228911	0.0301003	0.0888146	0.0551839	0	0.214047
'GMR_45C07_AE_01_UAS_TNT_2_0003'	0.157348	0.267925	0.0182811	0.301104	0.105769	0	0.149573
'GMR_45D11_AE_01_UAS_TNT_2_0003'	0.485895	0.230783	0.0259773	0.0679148	0.0267988	0	0.162631
'GMR_45E03_AE_01_UAS_TNT_2_0003'	0.306208	0.189991	0.0349475	0.133071	0.115346	0	0.220437
'GMR_45F04_AE_01_UAS_TNT_2_0003'	0.235	0.305	0.025	0.21	0.0733333	0	0.151667
'GMR_45F08_AE_01_UAS_TNT_2_0003'	0.468254	0.183333	0.081746	0.0579365	0.0825397	0	0.12619
'GMR_45G05_AE_01_UAS_TNT_2_0003'	0.474719	0.212547	0.0318352	0.0374532	0.108614	0	0.134831
'GMR_45H03_AE_01_UAS_TNT_2_0003'	0.279304	0.311355	0.0155678	0.134615	0.0769231	0	0.182234
'GMR_46B01_AE_01_UAS_TNT_2_0003'	0.189336	0.280062	0.0206553	0.181526	0.136973	0	0.191448
'GMR_46C06_AE_01_UAS_TNT_2_0003'	0.279935	0.297735	0.00647249	0.128641	0.156149	0	0.131068
'GMR_46C12_AE_01_UAS_TNT_2_0003'	0.195545	0.260295	0.00922688	0.25654	0.0837218	0	0.194671
'GMR_46F08_AE_01_UAS_TNT_2_0003'	0.193407	0.294322	0.0166667	0.157326	0.107875	0	0.230403
'GMR_46G06_AE_01_UAS_TNT_2_0003'	0.361702	0.193262	0.0567376	0.14539	0.0957447	0	0.147163
'GMR_46H07_AE_01_UAS_TNT_2_0003'	0.352201	0.157233	0.0267296	0.102201	0.0974843	0	0.264151
'GMR_46H09_AE_01_UAS_TNT_2_0003'	0.327257	0.181824	0.0133213	0.167301	0.070446	0	0.23985
'GMR_46H11_AE_01_UAS_TNT_2_0003'	0.371061	0.283726	0.0178539	0.0822341	0.083638	0	0.161487
'GMR_47A04_AE_01_UAS_TNT_2_0003'	0.378917	0.344729	0.034188	0.0769231	0	0	0.165242
'GMR_47A09_AE_01_UAS_TNT_2_0003'	0.332794	0.218094	0.042735	0.109099	0.0802423	0	0.217036
'GMR_47B04_AE_01_UAS_TNT_2_0003'	0.219551	0.280048	0.0140797	0.197173	0.0980426	0.00372024	0.187386
'GMR_47B12_AE_01_UAS_TNT_2_0003'	0.286204	0.285302	0.0399783	0.0467678	0.100578	0	0.24117
'GMR_47C09_AE_01_UAS_TNT_2_0003'	0.225962	0.345379	0.00549451	0.0983288	0.140911	0	0.183925
'GMR_47D07_AE_01_UAS_TNT_2_0003'	0.320321	0.279277	0.0337734	0.0472637	0.124665	0	0.1947
'GMR_47E06_AE_01_UAS_TNT_2_0003'	0.36579	0.214542	0.0278872	0.161151	0.0621739	0	0.168457
'GMR_47E12_AE_01_UAS_TNT_2_0003'	0.317852	0.245283	0.00580552	0.165457	0.127721	0	0.137881
'GMR_47F07_AE_01_UAS_TNT_2_0003'	0.318421	0.289766	0.0166667	0.0798246	0.0827485	0.0105263	0.202047
'GMR_47G07_AE_01_UAS_TNT_2_0003'	0.289927	0.305311	0.0120879	0.138919	0.0611722	0	0.192582
'GMR_47H04_AE_01_UAS_TNT_2_0003'	0.292424	0.278788	0.00757576	0.130303	0.080303	0.030303	0.180303
'GMR_47H07_AE_01_UAS_TNT_2_0003'	0.206096	0.290276	0.0667634	0.0899855	0.113208	0	0.233672
'GMR_47H09_AE_01_UAS_TNT_2_0003'	0.373964	0.221302	0.035503	0.142012	0.0844181	0	0.142801
'GMR_48B10_AE_01_UAS_TNT_2_0003'	0.126704	0.406676	0.0148418	0.271252	0.0266228	0	0.153904
'GMR_48F09_AE_01_UAS_TNT_2_0003'	0.118546	0.278639	0.0100105	0.321391	0.0985248	0	0.172889
'GMR_49A06_AE_01_UAS_TNT_2_0003'	0.546235	0.198551	0.0898871	0.0244212	0.0147579	0	0.126148
'GMR_49C01_AE_01_UAS_TNT_2_0003'	0.384615	0.321538	0.0307692	0.112308	0.0246154	0	0.126154
'GMR_49D10_AE_01_UAS_TNT_2_0003'	0.155914	0.426523	0.00268817	0.199821	0.0743728	0	0.140681
'GMR_49E07_AE_01_UAS_TNT_2_0003'	0.205882	0.375817	0.0163399	0.156863	0.148693	0	0.0964052
'GMR_49E12_AE_01_UAS_TNT_2_0003'	0.289386	0.24468	0.0352278	0.108588	0.128752	0	0.193366
'GMR_49H10_AE_01_UAS_TNT_2_0003'	0.508454	0.161557	0.0471634	0.0485879	0.0579091	0	0.176329
'GMR_50A11_AE_01_UAS_TNT_2_0003'	0.226319	0.285177	0.0169527	0.113266	0.110882	0	0.247404
'GMR_50C09_AE_01_UAS_TNT_2_0003'	0.179763	0.263539	0.0370248	0.121298	0.154067	0	0.244308
'GMR_50H06_AE_01_UAS_TNT_2_0003'	0.37621	0.319303	0.0541111	0.0225831	0.0389031	0.0102041	0.178686
'GMR_51A03_AE_01_UAS_TNT_2_0003'	0.297872	0.251376	0.00275257	0.113227	0.14105	0	0.193721
'GMR_51E06_AE_01_UAS_TNT_2_0003'	0.365878	0.233728	0.0463511	0.0512821	0.123274	0	0.179487
'GMR_51F01_AE_01_UAS_TNT_2_0003'	0.348193	0.263513	0.0451632	0.0803832	0.108719	0	0.154028
'GMR_51F05_AE_01_UAS_TNT_2_0003'	0.189762	0.271556	0.0367961	0.140806	0.13109	0	0.229989
'GMR_51G10_AE_01_UAS_TNT_2_0003'	0.224986	0.268195	0.0287257	0.151774	0.136013	0	0.190307
'GMR_52A06_AE_01_UAS_TNT_2_0003'	0.441441	0.252252	0.027027	0.0225225	0.0202703	0	0.236486
'GMR_52B08_AE_01_UAS_TNT_2_0003'	0.276094	0.152637	0.00785634	0.12009	0.204265	0	0.239057
'GMR_52B10_AE_01_UAS_TNT_2_0003'	0.233627	0.279657	0.00841829	0.187905	0.036299	0	0.254093
'GMR_52E12_AE_01_UAS_TNT_2_0003'	0.283784	0.272523	0.0416667	0.138514	0.0551802	0	0.208333
'GMR_52F01_AE_01_UAS_TNT_2_0003'	0.261905	0.41369	0.00892857	0.123016	0.0327381	0	0.159722
'GMR_52F10_AE_01_UAS_TNT_2_0003'	0.380769	0.298028	0.0384615	0.0954635	0.0389546	0	0.148323
'GMR_52F12_AE_01_UAS_TNT_2_0003'	0.233221	0.303476	0.0416021	0.213991	0.037472	0	0.170237
'GMR_52G02_AE_01_UAS_TNT_2_0003'	0.240317	0.36637	0.00472773	0.17954	0.0802575	0	0.128788
'GMR_52G05_AE_01_UAS_TNT_2_0003'	0.184416	0.439161	0.00559441	0.102298	0.0979021	0	0.170629
'GMR_52G08_AE_01_UAS_TNT_2_0003'	0.590323	0.182559	0.0680208	0.0105949	0.0195286	0	0.128973
'GMR_53A10_AE_01_UAS_TNT_2_0003'	0.32737	0.21288	0.0284735	0.118143	0.12023	0	0.192904
'GMR_53F05_AE_01_UAS_TNT_2_0003'	0.355344	0.227459	0.0291165	0.149985	0.060241	0	0.177854
'GMR_53F11_AE_01_UAS_TNT_2_0003'	0.337413	0.20979	0.0174825	0.0839161	0.174825	0	0.176573
'GMR_53G05_AE_01_UAS_TNT_2_0003'	0.611606	0.186894	0.0257162	0.00992556	0.0463569	0	0.119501
'GMR_53G06_AE_01_UAS_TNT_2_0003'	0.181818	0.355615	0	0.0561497	0.291444	0	0.114973
'GMR_53H01_AE_01_UAS_TNT_2_0003'	0.226621	0.254431	0.0384615	0.0588235	0.268759	0	0.152903
'GMR_54A01_AE_01_UAS_TNT_2_0003'	0.269516	0.215772	0.0397829	0.288894	0.0251411	0	0.160894
'GMR_54A03_AE_01_UAS_TNT_2_0003'	0.283919	0.341765	0.0324693	0.0576923	0.0949693	0	0.189185
'GMR_54C08_AE_01_UAS_TNT_2_0003'	0.255319	0.340426	0.0265957	0.0975177	0.102837	0	0.177305
'GMR_54D09_AE_01_UAS_TNT_2_0003'	0.212644	0.25431	0.00718391	0.119253	0.185345	0	0.221264
'GMR_54E05_AE_01_UAS_TNT_2_0003'	0.401042	0.331597	0.0225694	0.078125	0.0173611	0	0.149306
'GMR_54F05_AE_01_UAS_TNT_2_0003'	0.215719	0.326087	0.0585284	0.188963	0.0551839	0	0.155518
'GMR_54F09_AE_01_UAS_TNT_2_0003'	0.223111	0.349387	0.00221239	0.107443	0.115101	0	0.202746
'GMR_54G08_AE_01_UAS_TNT_2_0003'	0.31401	0.24686	0.00603865	0.115942	0.0995169	0.00966184	0.207971
'GMR_55C05_AE_01_UAS_TNT_2_0003'	0.142012	0.336982	0.00295858	0.197239	0.13794	0	0.182868
'GMR_55C12_AE_01_UAS_TNT_2_0003'	0.361589	0.246415	0.0300102	0.0646256	0.0764447	0	0.220915
'GMR_55E05_AE_01_UAS_TNT_2_0003'	0.198352	0.248626	0.0367674	0.15087	0.119093	0	0.246291
'GMR_56C09_AE_01_UAS_TNT_2_0003'	0.214464	0.27477	0.0132562	0.145071	0.153473	0	0.198967
'GMR_56E09_AE_01_UAS_TNT_2_0003'	0.170814	0.278752	0	0.126225	0.252262	0	0.171946
'GMR_56H08_AE_01_UAS_TNT_2_0003'	0.210256	0.310897	0.0172276	0.162901	0.0832532	0	0.215465
'GMR_56H09_AE_01_UAS_TNT_2_0003'	0.252114	0.241015	0.049771	0.150282	0.0843023	0	0.222516
'GMR_57B05_AD_01_UAS_TNT_2_0003'	0.228395	0.315586	0.0300926	0.104167	0.152469	0	0.16929
'GMR_57D01_AD_01_UAS_TNT_2_0003'	0.436498	0.1457	0.0317842	0.0635016	0.11692	0	0.205596
'GMR_57E10_AD_01_UAS_TNT_2_0003'	0.359381	0.185389	0.0715812	0.12093	0.0721917	0	0.190527
'GMR_57F07_AD_01_UAS_TNT_2_0003'	0.254541	0.344818	0.0720264	0.0736289	0.0758547	0	0.179131
'GMR_58E02_AE_01_UAS_TNT_2_0003'	0.335833	0.177129	0.0235292	0.154401	0.0794601	0.000202963	0.229444
'GMR_58E05_AE_01_UAS_TNT_2_0003'	0.287936	0.26797	0.0723471	0.133775	0.0532787	0	0.184694
'GMR_58E07_AE_01_UAS_TNT_2_0003'	0.32426	0.318343	0.0106509	0.0284024	0.0508876	0.00710059	0.260355
'GMR_58F08_AE_01_UAS_TNT_2_0003'	0.408499	0.275538	0.0189206	0.0718569	0.0752688	0	0.149917
'GMR_58F10_AE_01_UAS_TNT_2_0003'	0.285388	0.235731	0.00913242	0.151826	0.102169	0	0.215753
'GMR_58G09_AE_01_UAS_TNT_2_0003'	0.422684	0.256658	0.036311	0.0280397	0.0738007	0	0.182506
'GMR_58G10_AE_01_UAS_TNT_2_0003'	0.173034	0.269837	0.00831601	0.194647	0.104946	0	0.24922
'GMR_58H11_AE_01_UAS_TNT_2_0003'	0.34513	0.191996	0.056713	0.107149	0.0769231	0	0.222089
'GMR_59A01_AE_01_UAS_TNT_2_0003'	0.398221	0.187467	0.0529173	0.0214547	0.126832	0	0.213108
'GMR_59A05_AE_01_UAS_TNT_2_0003'	0.287991	0.262762	0.0256998	0.075394	0.104387	0	0.243766
'GMR_60D10_AE_01_UAS_TNT_2_0003'	0.233073	0.243815	0.0205078	0.198568	0.161458	0	0.142578
'GMR_60F02_AE_01_UAS_TNT_2_0003'	0.314099	0.251981	0.0224791	0.0723701	0.116535	0	0.222536
'GMR_60F09_AE_01_UAS_TNT_2_0003'	0.283293	0.316644	0.0313294	0.0954031	0.0976265	0	0.175705
'GMR_60G08_AE_01_UAS_TNT_2_0003'	0.311728	0.356481	0	0.0771605	0.106481	0	0.148148
'GMR_60G09_AE_01_UAS_TNT_2_0003'	0.373126	0.252837	0.0143968	0.111391	0.0673602	0	0.180888
'GMR_61A01_AE_01_UAS_TNT_2_0003'	0.224805	0.353695	0.0369532	0.102564	0.147059	0	0.134924
'GMR_61D08_AD_01_UAS_TNT_2_0003'	0.452889	0.204309	0.103935	0.0165794	0.0533427	0.000396511	0.168548
'GMR_61E08_AE_01_UAS_TNT_2_0003'	0.285709	0.250236	0.0735803	0.122621	0.0822715	0	0.185583
'GMR_61F01_AE_01_UAS_TNT_2_0003'	0.228632	0.217949	0.0790598	0.239316	0.0128205	0	0.222222
'GMR_62A02_AD_01_UAS_TNT_2_0003'	0.199735	0.261905	0	0.128307	0.269841	0	0.140212
'GMR_64A06_AE_01_UAS_TNT_2_0003'	0.268653	0.271963	0.0193884	0.138609	0.0898487	0	0.211538
'GMR_64B07_AE_01_UAS_TNT_2_0003'	0.274194	0.313268	0.0148366	0.101685	0.150124	0.00496278	0.14093
'GMR_64E03_AE_01_UAS_TNT_2_0003'	0.47998	0.105687	0.0598948	0.0511506	0.0807692	0	0.222518
'GMR_64F07_AE_01_UAS_TNT_2_0003'	0.412358	0.194199	0.0126103	0.0983607	0.119798	0	0.162673
'GMR_64G02_AE_01_UAS_TNT_2_0003'	0.375	0.230612	0.059111	0.0767654	0.0819672	0	0.176545
'GMR_64G05_AE_01_UAS_TNT_2_0003'	0.307575	0.311456	0.0209951	0.0905081	0.107328	0	0.162138
'GMR_65B04_AE_01_UAS_TNT_2_0003'	0.324846	0.385802	0.0131173	0.0447531	0.0671296	0	0.164352
'GMR_65C03_AE_01_UAS_TNT_2_0003'	0.316955	0.258499	0.0205772	0.105326	0.140707	0	0.157936
'GMR_65E06_AE_01_UAS_TNT_2_0003'	0.506456	0.192485	0.0493085	0.0697938	0.0335353	0	0.148421
'GMR_65F09_AE_01_UAS_TNT_2_0003'	0.460482	0.215201	0.0362074	0.0595238	0.086785	0	0.141801
'GMR_65F10_AE_01_UAS_TNT_2_0003'	0.234114	0.337793	0.00668896	0.114827	0.149387	0	0.157191
'GMR_66A03_AE_01_UAS_TNT_2_0003'	0.281746	0.353693	0.00810185	0.0853325	0.126984	0.00496032	0.139182
'GMR_66A12_AE_01_UAS_TNT_2_0003'	0.355142	0.246969	0.0383919	0.0926352	0.0460563	0	0.220805
'GMR_66B07_AE_01_UAS_TNT_2_0003'	0.386792	0.261006	0.00786164	0.091195	0.0754717	0	0.177673
'GMR_66C07_AE_01_UAS_TNT_2_0003'	0.205641	0.239026	0.0339487	0.166872	0.197487	0	0.157026
'GMR_66C08_AE_01_UAS_TNT_2_0003'	0.186742	0.321231	0.0325656	0.109836	0.186687	0	0.162938
'GMR_68A07_AD_01_UAS_TNT_2_0003'	0.301683	0.19765	0.0694444	0.0759882	0.133814	0	0.221421
'GMR_68A08_AE_01_UAS_TNT_2_0003'	0.374508	0.291684	0.0352734	0.0258106	0.0975444	0	0.17518
'GMR_68B05_AE_01_UAS_TNT_2_0003'	0.169414	0.330243	0.0230415	0.202233	0.118811	0	0.156257
'GMR_68B06_AE_01_UAS_TNT_2_0003'	0.243333	0.287564	0.010641	0.142179	0.169872	0	0.14641
'GMR_68C05_AE_01_UAS_TNT_2_0003'	0.328544	0.213602	0.0114943	0.117816	0.10728	0	0.221264
'GMR_68C09_AE_01_UAS_TNT_2_0003'	0.290179	0.363095	0.00595238	0.11756	0.0580357	0	0.165179
'GMR_69B06_AE_01_UAS_TNT_2_0003'	0.165254	0.491525	0	0.0522599	0.159605	0	0.131356
'GMR_69C11_AE_01_UAS_TNT_2_0003'	0.379487	0.19359	0.0333333	0.0794872	0.0782051	0	0.235897
'GMR_69D08_AE_01_UAS_TNT_2_0003'	0.273504	0.221772	0.0616284	0.0253036	0.105376	0	0.312416
'GMR_69E06_AE_01_UAS_TNT_2_0003'	0.200401	0.32438	0.0251397	0.174724	0.0812921	0	0.194062
'GMR_69F06_AE_01_UAS_TNT_2_0003'	0.271619	0.268635	0.0181101	0.0998233	0.128327	0	0.213485
'GMR_69F09_AE_01_UAS_TNT_2_0003'	0.322917	0.420573	0.0104167	0.0325521	0.0572917	0	0.15625
'GMR_70C09_AE_01_UAS_TNT_2_0003'	0.144613	0.344801	0.00893907	0.101564	0.187662	0	0.212421
'GMR_70D06_AE_01_UAS_TNT_2_0003'	0.223451	0.39575	0	0.105457	0.103982	0.000737463	0.170622
'GMR_71A10_AE_01_UAS_TNT_2_0003'	0.192622	0.264329	0.00163399	0.241579	0.131285	0	0.168552
'GMR_71C03_AE_01_UAS_TNT_2_0003'	0.183541	0.282127	0.00791855	0.204412	0.153846	0	0.168156
'GMR_72A08_AE_01_UAS_TNT_2_0003'	0.272035	0.409722	0.0164263	0.0320513	0.0507479	0	0.219017
'GMR_72A10_AE_01_UAS_TNT_2_0003'	0.209322	0.219087	0.0219267	0.228133	0.138989	0	0.182543
'GMR_72E03_AE_01_UAS_TNT_2_0003'	0.192678	0.270833	0.00591716	0.247904	0.0873397	0	0.195328
'GMR_72F03_AE_01_UAS_TNT_2_0003'	0.269231	0.171795	0.0128205	0.0641026	0.223077	0	0.258974
'GMR_72F11_AE_01_UAS_TNT_2_0003'	0.0693523	0.312389	0.0031775	0.406664	0.0607317	0	0.147685
'GMR_72G06_AE_01_UAS_TNT_2_0003'	0.612783	0.209247	0.0759012	0.015236	0.0178682	0	0.0689644
'GMR_72H06_AE_01_UAS_TNT_2_0003'	0.705974	0.0743167	0.0691744	0.00869963	0.0164835	0	0.125352
'GMR_73C04_AE_01_UAS_TNT_2_0003'	0.325581	0.277132	0.0368217	0.116279	0.108527	0	0.135659
'GMR_73E05_AE_01_UAS_TNT_2_0003'	0.287879	0.227273	0.00757576	0.102273	0.185606	0	0.189394
'GMR_73F03_AE_01_UAS_TNT_2_0003'	0.274725	0.274725	0.203297	0.0659341	0	0	0.181319
'GMR_73G07_AE_01_UAS_TNT_2_0003'	0.106838	0.297721	0.014245	0.267806	0.0555556	0	0.257835
'GMR_73H04_AE_01_UAS_TNT_2_0003'	0.28559	0.37283	0.0225694	0.0269097	0.103299	0.00607639	0.182726
'GMR_73H07_AE_01_UAS_TNT_2_0003'	0.418369	0.213414	0.0425292	0.175829	0.030585	0	0.119274
'GMR_73H12_AE_01_UAS_TNT_2_0003'	0.18287	0.208333	0.0115741	0.171296	0.224537	0	0.201389
'GMR_74D08_AE_01_UAS_TNT_2_0003'	0.22	0.36875	0.00375	0.075	0.19625	0	0.13625
'GMR_74E03_AE_01_UAS_TNT_2_0003'	0.216374	0.225146	0	0.100877	0.238304	0	0.219298
'GMR_74F03_AE_01_UAS_TNT_2_0003'	0.252222	0.241282	0.0592308	0.053547	0.129017	0	0.264701
'GMR_74G10_AE_01_UAS_TNT_2_0003'	0.304398	0.210648	0.0405093	0.157407	0.0868056	0	0.200231
'GMR_74H08_AE_01_UAS_TNT_2_0003'	0.325008	0.245754	0.00599401	0.0844156	0.205045	0	0.133783
'GMR_75B02_AE_01_UAS_TNT_2_0003'	0.206419	0.195595	0.00160256	0.251164	0.132612	0	0.212607
'GMR_75F01_AE_01_UAS_TNT_2_0003'	0.259945	0.19955	0.00564796	0.220605	0.100358	0	0.213895
'GMR_75G10_AE_01_UAS_TNT_2_0003'	0.196524	0.202667	0.00892857	0.278217	0.0721154	0	0.241548
'GMR_76A04_AE_01_UAS_TNT_2_0003'	0.398268	0.220779	0.0373377	0.0622294	0.0741342	0	0.207251
'GMR_76B02_AE_01_UAS_TNT_2_0003'	0.276364	0.34404	0.0327273	0.0490909	0.125455	0	0.172323
'GMR_76C04_AE_01_UAS_TNT_2_0003'	0.352941	0.25	0	0.161765	0.0269608	0	0.208333
'GMR_76D11_AE_01_UAS_TNT_2_0003'	0.158537	0.302846	0.0406504	0.182927	0.0995935	0	0.215447
'GMR_76E09_AE_01_UAS_TNT_2_0003'	0.362451	0.20013	0.00521512	0.161017	0.101695	0	0.169492
'GMR_76F05_AE_01_UAS_TNT_2_0003'	0.34113	0.283049	0.011088	0.0394317	0.227928	0	0.0973735
'GMR_76G01_AE_01_UAS_TNT_2_0003'	0.426136	0.278409	0.0113636	0.00757576	0.185606	0	0.0909091
'GMR_76G04_AE_01_UAS_TNT_2_0003'	0.405797	0.178372	0.0267559	0.148272	0.0535117	0	0.187291
'GMR_77B12_AE_01_UAS_TNT_2_0003'	0.431925	0.064554	0.0340376	0.164319	0.0399061	0	0.265258
'GMR_77D08_AE_01_UAS_TNT_2_0003'	0.243127	0.281787	0.0120275	0.109966	0.158935	0	0.194158
'GMR_77E09_AE_01_UAS_TNT_2_0003'	0.319788	0.248523	0.0101449	0.102341	0.120401	0	0.198802
'GMR_77F07_AE_01_UAS_TNT_2_0003'	0.111111	0.152778	0.00925926	0.347222	0	0	0.37963
'GMR_77H11_AE_01_UAS_TNT_2_0003'	0.307206	0.28078	0.0373414	0.113765	0.0840486	0.00192982	0.174928
'GMR_77H12_AE_01_UAS_TNT_2_0003'	0.392663	0.22192	0.0244565	0.0720109	0.0778986	0	0.211051
'GMR_78A01_AE_01_UAS_TNT_2_0003'	0.182378	0.2206	0.0191848	0.284912	0.0667382	0	0.226188
'GMR_78G08_AE_01_UAS_TNT_2_0003'	0.227193	0.322281	0.0315789	0.139474	0.110526	0	0.168947
'GMR_78H06_AE_01_UAS_TNT_2_0003'	0.175878	0.383001	0.0195632	0.142165	0.154321	0	0.125071
'GMR_78H08_AE_01_UAS_TNT_2_0003'	0.18018	0.306306	0.0382883	0.182432	0.0337838	0	0.259009
'GMR_79A08_AE_01_UAS_TNT_2_0003'	0.330128	0.290598	0.0117521	0.106838	0.125	0	0.135684
'GMR_79B04_AE_01_UAS_TNT_2_0003'	0.286022	0.28862	0.00752688	0.145161	0.119355	0.00967742	0.143638
'GMR_79C09_AE_01_UAS_TNT_2_0003'	0.203471	0.271019	0.00340136	0.142508	0.198369	0	0.181231
'GMR_79E02_AE_01_UAS_TNT_2_0003'	0.315344	0.287561	0.0545415	0.0566213	0.0805757	0	0.205356
'GMR_79F02_AE_01_UAS_TNT_2_0003'	0.215403	0.29638	0.0370946	0.115715	0.120569	0	0.214838
'GMR_79F08_AE_01_UAS_TNT_2_0003'	0.462879	0.206002	0.0539627	0.0495921	0.0500583	0	0.177506
'GMR_79G12_AE_01_UAS_TNT_2_0003'	0.217751	0.29571	0.0227811	0.138314	0.119083	0	0.206361
'GMR_79H04_AE_01_UAS_TNT_2_0003'	0.151639	0.346784	0.0119798	0.139082	0.0843842	0	0.266131
'GMR_79H06_AE_01_UAS_TNT_2_0003'	0.22611	0.298494	0.0186114	0.178773	0.0659049	0	0.212107
'GMR_80B11_AE_01_UAS_TNT_2_0003'	0.0773196	0.38488	0.000859107	0.232818	0.102234	0.00171821	0.200172
'GMR_80C01_AE_01_UAS_TNT_2_0003'	0.310606	0.260101	0.0252525	0.0934343	0.113636	0	0.19697
'GMR_80D10_AE_01_UAS_TNT_2_0003'	0.309524	0.261905	0.022619	0.0821429	0.17381	0	0.15
'GMR_80H05_AE_01_UAS_TNT_2_0003'	0.174679	0.3125	0.00160256	0.0977564	0.142628	0	0.270833
'GMR_80H11_AE_01_UAS_TNT_2_0003'	0.201567	0.324176	0.00732601	0.0915751	0.208791	0	0.166565
'GMR_82B06_AE_01_UAS_TNT_2_0003'	0.360065	0.238134	0.0212766	0.0832242	0.173486	0	0.123813
'GMR_82E12_AE_01_UAS_TNT_2_0003'	0.349765	0.441315	0	0.0258216	0.105634	0.00469484	0.07277
'GMR_82G02_AE_01_UAS_TNT_2_0003'	0.29783	0.183432	0	0.266075	0.0357002	0	0.216963
'GMR_83B04_AE_01_UAS_TNT_2_0003'	0.186839	0.307289	0.0164067	0.142057	0.123902	0	0.223507
'GMR_83B05_AE_01_UAS_TNT_2_0003'	0.239583	0.319444	0.00810185	0.155093	0.122685	0	0.155093
'GMR_84B09_AE_01_UAS_TNT_2_0003'	0.452055	0.216742	0.02254	0.094364	0.0659133	0	0.148386
'GMR_84B11_AE_01_UAS_TNT_2_0003'	0.137019	0.333734	0.00336538	0.305288	0.0581731	0	0.16242
'GMR_84D04_AE_01_UAS_TNT_2_0003'	0.297872	0.283142	0.00327332	0.163666	0.0769231	0	0.175123
'GMR_84H10_AE_01_UAS_TNT_2_0003'	0.240281	0.352047	0.020885	0.104632	0.0790943	0	0.20306
'GMR_85A01_AE_01_UAS_TNT_2_0003'	0.234687	0.26773	0.0280821	0.0938954	0.172501	0	0.203104
'GMR_85A02_AE_01_UAS_TNT_2_0003'	0.444444	0.21627	0.0456349	0.0496032	0.0734127	0	0.170635
'GMR_85A03_AE_01_UAS_TNT_2_0003'	0.324129	0.237061	0.0196265	0.18194	0.0740345	0	0.163208
'GMR_85B01_AE_01_UAS_TNT_2_0003'	0.440785	0.297909	0.0113854	0.0432772	0.0334386	0	0.173204
'GMR_85F12_AE_01_UAS_TNT_2_0003'	0.202473	0.174048	0.0176768	0.261655	0.123155	0	0.220992
'GMR_85G05_AE_01_UAS_TNT_2_0003'	0.239726	0.276256	0.00513699	0.145548	0.178653	0.00285388	0.151826
'GMR_86D09_AE_01_UAS_TNT_2_0003'	0.429301	0.316545	0.063933	0.0300841	0.0372236	0	0.122914
'GMR_87G02_AE_01_UAS_TNT_2_0003'	0.423077	0.266827	0.00600962	0	0.110577	0	0.19351
'GMR_87G04_AE_01_UAS_TNT_2_0003'	0.282717	0.182817	0.000999001	0.106893	0.118881	0	0.307692
'GMR_88B06_AE_01_UAS_TNT_2_0003'	0.223744	0.185952	0.00283086	0.2569	0.148645	0	0.181928
'GMR_88B11_AE_01_UAS_TNT_2_0003'	0.221612	0.231278	0	0.163207	0.195767	0	0.188136
'GMR_88C02_AE_01_UAS_TNT_2_0003'	0.38479	0.223776	0	0.0627622	0.148252	0.0013986	0.179021
'GMR_88H09_AE_01_UAS_TNT_2_0003'	0.327473	0.236355	0.0043956	0.115934	0.151648	0	0.164194
'GMR_90D03_AD_01_UAS_TNT_2_0003'	0.258013	0.32264	0	0.102564	0.19391	0.00801282	0.11486
'GMR_91A09_AE_01_UAS_TNT_2_0003'	0.266129	0.307796	0.00134409	0.0295699	0.251344	0.016129	0.127688
'GMR_92G03_AE_01_UAS_TNT_2_0003'	0.217987	0.31696	0.00741427	0.141952	0.127819	0	0.187867
'GMR_92H01_AE_01_UAS_TNT_2_0003'	0.406085	0.216931	0.0026455	0.0793651	0.193122	0	0.101852
'GMR_92H04_AE_01_UAS_TNT_2_0003'	0.276753	0.264568	0.00833071	0.172302	0.096364	0	0.181683
'GMR_93A03_AE_01_UAS_TNT_2_0003'	0.235897	0.270513	0.0205128	0.0961538	0.0666667	0	0.310256
'GMR_93A07_AE_01_UAS_TNT_2_0003'	0.288538	0.310277	0.0652174	0.150198	0.0256917	0	0.160079
'GMR_93F10_AE_01_UAS_TNT_2_0003'	0.237847	0.376736	0	0.0711806	0.178819	0	0.135417
'GMR_94B01_AE_01_UAS_TNT_2_0003'	0.428571	0.154762	0.00793651	0.123016	0.0714286	0	0.214286
'GMR_94E09_AE_01_UAS_TNT_2_0003'	0.234384	0.305807	0.0138289	0.140882	0.121003	0	0.184097
'GMR_95A10_AE_01_UAS_TNT_2_0003'	0.487981	0.15625	0	0.105769	0.132212	0	0.117788
'GMR_95B09_AE_01_UAS_TNT_2_0003'	0.327393	0.258842	0.0150309	0.116987	0.114583	0.000331565	0.166832
'GMR_95B11_AE_01_UAS_TNT_2_0003'	0.204301	0.417115	0	0.0658602	0.167563	0	0.145161
'GMR_95D02_AE_01_UAS_TNT_2_0003'	0.272013	0.168239	0.00943396	0.27673	0.0487421	0	0.224843
'GMR_9C07_AE_01_UAS_TNT_2_0003'	0.252299	0.258621	0.0287356	0.161494	0.121264	0	0.177586
'GMR_9D11_AE_01_UAS_TNT_2_0003'	0.22096	0.291486	0.0238095	0.122114	0.140753	0	0.200878
'JHS_or83b_EXT01_UAS_TNT_2_0003'	0.142881	0.296643	0.0080748	0.228219	0.178496	0	0.145686
'RD_206_UAS_TNT_2_0003'	0.0401643	0.333069	0.00450721	0.350219	0.0573417	0	0.214698
MZZ_R_3005998_UAS_TNT_2_0003'	0.286839	0.306046	0.0946196	0.11904	0.0307018	0	0.162755
MZZ_K_42265_UAS_TNT_2_0003'	0.371184	0.261416	0.137668	0.00967644	0.0391026	0	0.180952

## Sheet: Sheet3
'FCF_attP2_1500062_UAS_TNT_2_0003'	0.241124	0.297882	0.0335859	0.18481	0.0643988	2.95281e-05	0.17817
'FCF_w1118_1500005_UAS_TNT_2_0003'	0.405957	0.231959	0.0404192	0.0714596	0.0885665	0.000665336	0.160973
'GMR_18E12_AE_01_UAS_TNT_2_0003'	0.336138	0.242531	0.0331387	0.0997882	0.106656	0	0.181748
'GMR_23D10_AE_01_UAS_TNT_2_0003'	0.437229	0.181277	0.0119048	0.086039	0.148268	0	0.135281
'GMR_24G12_AE_01_UAS_TNT_2_0003'	0.348974	0.199231	0.0127692	0.119744	0.105641	0	0.213641
'GMR_27B12_AE_01_UAS_TNT_2_0003'	0.313958	0.426981	0.0167727	0.0572585	0.0382206	0	0.146809
'GMR_29D11_AE_01_UAS_TNT_2_0003'	0.302	0.267333	0.00933333	0.092	0.151333	0	0.178
'GMR_36C01_AE_01_UAS_TNT_2_0003'	0.306245	0.323572	0.0170455	0.0755148	0.112908	0	0.164714
'GMR_38A07_AE_01_UAS_TNT_2_0003'	0.326211	0.25641	0	0.0541311	0.249288	0	0.11396
'GMR_40F05_AE_01_UAS_TNT_2_0003'	0.232517	0.286713	0	0.0629371	0.277972	0	0.13986
'GMR_61A01_AE_01_UAS_TNT_2_0003'	0.224805	0.353695	0.0369532	0.102564	0.147059	0	0.134924
'GMR_74D08_AE_01_UAS_TNT_2_0003'	0.22	0.36875	0.00375	0.075	0.19625	0	0.13625
'GMR_82B06_AE_01_UAS_TNT_2_0003'	0.360065	0.238134	0.0212766	0.0832242	0.173486	0	0.123813
'GMR_95B09_AE_01_UAS_TNT_2_0003'	0.327393	0.258842	0.0150309	0.116987	0.114583	0.000331565	0.166832
'FCF_attP2_1500062_UAS_TNT_2_0003'	0.241124	0.297882	0.0335859	0.18481	0.0643988	2.95281e-05	0.17817

## Sheet: Sheet2
	883	883	883	883	883	883	883
	4838	4838	4838	4838	4838	4838	4838
	501	501	501	501	501	501	501
	152	152	152	152	152	152	152
	41	41	41	41	41	41	41
	99	99	99	99	99	99	99
	74	74	74	74	74	74	74
	175	175	175	175	175	175	175
	158	158	158	158	158	158	158
	232	232	232	232	232	232	232
	214	214	214	214	214	214	214
	180	180	180	180	180	180	180
	166	166	166	166	166	166	166
	126	126	126	126	126	126	126
	112	112	112	112	112	112	112
	100	100	100	100	100	100	100
	201	201	201	201	201	201	201
	121	121	121	121	121	121	121
	117	117	117	117	117	117	117
	91	91	91	91	91	91	91
	101	101	101	101	101	101	101
	211	211	211	211	211	211	211
	125	125	125	125	125	125	125
	123	123	123	123	123	123	123
	29	29	29	29	29	29	29
	41	41	41	41	41	41	41
	81	81	81	81	81	81	81
	113	113	113	113	113	113	113
	194	194	194	194	194	194	194
	50	50	50	50	50	50	50
	167	167	167	167	167	167	167
	108	108	108	108	108	108	108
	80	80	80	80	80	80	80
	62	62	62	62	62	62	62
	249	249	249	249	249	249	249
	103	103	103	103	103	103	103
	134	134	134	134	134	134	134
	121	121	121	121	121	121	121
	70	70	70	70	70	70	70
	65	65	65	65	65	65	65
	60	60	60	60	60	60	60
	127	127	127	127	127	127	127
	70	70	70	70	70	70	70
	32	32	32	32	32	32	32
	43	43	43	43	43	43	43
	71	71	71	71	71	71	71
	133	133	133	133	133	133	133
	76	76	76	76	76	76	76
	130	130	130	130	130	130	130
	166	166	166	166	166	166	166
	69	69	69	69	69	69	69
	35	35	35	35	35	35	35
	199	199	199	199	199	199	199
	312	312	312	312	312	312	312
	70	70	70	70	70	70	70
	91	91	91	91	91	91	91
	49	49	49	49	49	49	49
	162	162	162	162	162	162	162
	167	167	167	167	167	167	167
	490	490	490	490	490	490	490
	484	484	484	484	484	484	484
	84	84	84	84	84	84	84
	53	53	53	53	53	53	53
	53	53	53	53	53	53	53
	637	637	637	637	637	637	637
	326	326	326	326	326	326	326
	27	27	27	27	27	27	27
	223	223	223	223	223	223	223
	334	334	334	334	334	334	334
	166	166	166	166	166	166	166
	224	224	224	224	224	224	224
	45	45	45	45	45	45	45
	275	275	275	275	275	275	275
	193	193	193	193	193	193	193
	102	102	102	102	102	102	102
	68	68	68	68	68	68	68
	190	190	190	190	190	190	190
	118	118	118	118	118	118	118
	150	150	150	150	150	150	150
	113	113	113	113	113	113	113
	98	98	98	98	98	98	98
	205	205	205	205	205	205	205
	553	553	553	553	553	553	553
	354	354	354	354	354	354	354
	155	155	155	155	155	155	155
	131	131	131	131	131	131	131
	467	467	467	467	467	467	467
	161	161	161	161	161	161	161
	143	143	143	143	143	143	143
	287	287	287	287	287	287	287
	91	91	91	91	91	91	91
	223	223	223	223	223	223	223
	100	100	100	100	100	100	100
	30	30	30	30	30	30	30
	89	89	89	89	89	89	89
	178	178	178	178	178	178	178
	225	225	225	225	225	225	225
	73	73	73	73	73	73	73
	112	112	112	112	112	112	112
	74	74	74	74	74	74	74
	176	176	176	176	176	176	176
	150	150	150	150	150	150	150
	161	161	161	161	161	161	161
	83	83	83	83	83	83	83
	96	96	96	96	96	96	96
	81	81	81	81	81	81	81
	88	88	88	88	88	88	88
	65	65	65	65	65	65	65
	154	154	154	154	154	154	154
	124	124	124	124	124	124	124
	44	44	44	44	44	44	44
	74	74	74	74	74	74	74
	133	133	133	133	133	133	133
	289	289	289	289	289	289	289
	52	52	52	52	52	52	52
	43	43	43	43	43	43	43
	179	179	179	179	179	179	179
	325	325	325	325	325	325	325
	55	55	55	55	55	55	55
	83	83	83	83	83	83	83
	60	60	60	60	60	60	60
	131	131	131	131	131	131	131
	351	351	351	351	351	351	351
	50	50	50	50	50	50	50
	20	20	20	20	20	20	20
	71	71	71	71	71	71	71
	224	224	224	224	224	224	224
	55	55	55	55	55	55	55
	176	176	176	176	176	176	176
	40	40	40	40	40	40	40
	151	151	151	151	151	151	151
	200	200	200	200	200	200	200
	311	311	311	311	311	311	311
	133	133	133	133	133	133	133
	224	224	224	224	224	224	224
	142	142	142	142	142	142	142
	105	105	105	105	105	105	105
	189	189	189	189	189	189	189
	190	190	190	190	190	190	190
	69	69	69	69	69	69	69
	86	86	86	86	86	86	86
	62	62	62	62	62	62	62
	87	87	87	87	87	87	87
	96	96	96	96	96	96	96
	42	42	42	42	42	42	42
	125	125	125	125	125	125	125
	192	192	192	192	192	192	192
	142	142	142	142	142	142	142
	95	95	95	95	95	95	95
	115	115	115	115	115	115	115
	90	90	90	90	90	90	90
	110	110	110	110	110	110	110
	106	106	106	106	106	106	106
	279	279	279	279	279	279	279
	49	49	49	49	49	49	49
	234	234	234	234	234	234	234
	481	481	481	481	481	481	481
	161	161	161	161	161	161	161
	52	52	52	52	52	52	52
	247	247	247	247	247	247	247
	89	89	89	89	89	89	89
	116	116	116	116	116	116	116
	176	176	176	176	176	176	176
	85	85	85	85	85	85	85
	105	105	105	105	105	105	105
	104	104	104	104	104	104	104
	170	170	170	170	170	170	170
	120	120	120	120	120	120	120
	113	113	113	113	113	113	113
	76	76	76	76	76	76	76
	107	107	107	107	107	107	107
	184	184	184	184	184	184	184
	28	28	28	28	28	28	28
	123	123	123	123	123	123	123
	129	129	129	129	129	129	129
	139	139	139	139	139	139	139
	131	131	131	131	131	131	131
	104	104	104	104	104	104	104
	173	173	173	173	173	173	173
	82	82	82	82	82	82	82
	141	141	141	141	141	141	141
	92	92	92	92	92	92	92
	222	222	222	222	222	222	222
	137	137	137	137	137	137	137
	114	114	114	114	114	114	114
	61	61	61	61	61	61	61
	168	168	168	168	168	168	168
	140	140	140	140	140	140	140
	336	336	336	336	336	336	336
	132	132	132	132	132	132	132
	51	51	51	51	51	51	51
	109	109	109	109	109	109	109
	239	239	239	239	239	239	239
	112	112	112	112	112	112	112
	97	97	97	97	97	97	97
	141	141	141	141	141	141	141
	88	88	88	88	88	88	88
	44	44	44	44	44	44	44
	40	40	40	40	40	40	40
	174	174	174	174	174	174	174
	120	120	120	120	120	120	120
	72	72	72	72	72	72	72
	85	85	85	85	85	85	85
	68	68	68	68	68	68	68
	74	74	74	74	74	74	74
	195	195	195	195	195	195	195
	123	123	123	123	123	123	123
	189	189	189	189	189	189	189
	133	133	133	133	133	133	133
	54	54	54	54	54	54	54
	506	506	506	506	506	506	506
	42	42	42	42	42	42	42
	54	54	54	54	54	54	54
	116	116	116	116	116	116	116
	201	201	201	201	201	201	201
	46	46	46	46	46	46	46
	149	149	149	149	149	149	149
	36	36	36	36	36	36	36
	110	110	110	110	110	110	110
	41	41	41	41	41	41	41
	118	118	118	118	118	118	118
	39	39	39	39	39	39	39
	151	151	151	151	151	151	151
	125	125	125	125	125	125	125
	78	78	78	78	78	78	78
	116	116	116	116	116	116	116
	504	504	504	504	504	504	504
	245	245	245	245	245	245	245
	143	143	143	143	143	143	143
	48	48	48	48	48	48	48
	90	90	90	90	90	90	90
	113	113	113	113	113	113	113
	44	44	44	44	44	44	44
	96	96	96	96	96	96	96
	148	148	148	148	148	148	148
	254	254	254	254	254	254	254
	67	67	67	67	67	67	67
	61	61	61	61	61	61	61
	15	15	15	15	15	15	15
	37	37	37	37	37	37	37
	55	55	55	55	55	55	55
	13	13	13	13	13	13	13
	111	111	111	111	111	111	111
	66	66	66	66	66	66	66
	102	102	102	102	102	102	102
	326	326	326	326	326	326	326
	46	46	46	46	46	46	46
	108	108	108	108	108	108	108
	454	454	454	454	454	454	454
	166	166	166	166	166	166	166
	50	50	50	50	50	50	50
	105	105	105	105	105	105	105
	89	89	89	89	89	89	89
	91	91	91	91	91	91	91
	261	261	261	261	261	261	261
	103	103	103	103	103	103	103
	198	198	198	198	198	198	198
	35	35	35	35	35	35	35
	47	47	47	47	47	47	47
	53	53	53	53	53	53	53
	192	192	192	192	192	192	192
	568	568	568	568	568	568	568
	27	27	27	27	27	27	27
	309	309	309	309	309	309	309
	112	112	112	112	112	112	112
	71	71	71	71	71	71	71
	112	112	112	112	112	112	112
	67	67	67	67	67	67	67
	378	378	378	378	378	378	378
	53	53	53	53	53	53	53
	95	95	95	95	95	95	95
	70	70	70	70	70	70	70
	55	55	55	55	55	55	55
	53	53	53	53	53	53	53
	195	195	195	195	195	195	195
	111	111	111	111	111	111	111
	146	146	146	146	146	146	146
	268	268	268	268	268	268	268
	50	50	50	50	50	50	50
	93	93	93	93	93	93	93
	51	51	51	51	51	51	51
	326	326	326	326	326	326	326
	207	207	207	207	207	207	207
	121	121	121	121	121	121	121
	116	116	116	116	116	116	116
	196	196	196	196	196	196	196
	94	94	94	94	94	94	94
	78	78	78	78	78	78	78
	176	176	176	176	176	176	176
	204	204	204	204	204	204	204
	133	133	133	133	133	133	133
	37	37	37	37	37	37	37
	81	81	81	81	81	81	81
	83	83	83	83	83	83	83
	74	74	74	74	74	74	74
	84	84	84	84	84	84	84
	65	65	65	65	65	65	65
	149	149	149	149	149	149	149
	209	209	209	209	209	209	209
	55	55	55	55	55	55	55
	409	409	409	409	409	409	409
	86	86	86	86	86	86	86
	83	83	83	83	83	83	83
	44	44	44	44	44	44	44
	124	124	124	124	124	124	124
	34	34	34	34	34	34	34
	68	68	68	68	68	68	68
	359	359	359	359	359	359	359
	92	92	92	92	92	92	92
	47	47	47	47	47	47	47
	58	58	58	58	58	58	58
	48	48	48	48	48	48	48
	46	46	46	46	46	46	46
	113	113	113	113	113	113	113
	69	69	69	69	69	69	69
	169	169	169	169	169	169	169
	201	201	201	201	201	201	201
	140	140	140	140	140	140	140
	103	103	103	103	103	103	103
	68	68	68	68	68	68	68
	80	80	80	80	80	80	80
	86	86	86	86	86	86	86
	108	108	108	108	108	108	108
	96	96	96	96	96	96	96
	126	126	126	126	126	126	126
	72	72	72	72	72	72	72
	379	379	379	379	379	379	379
	61	61	61	61	61	61	61
	65	65	65	65	65	65	65
	62	62	62	62	62	62	62
	146	146	146	146	146	146	146
	310	310	310	310	310	310	310
	148	148	148	148	148	148	148
	144	144	144	144	144	144	144
	98	98	98	98	98	98	98
	109	109	109	109	109	109	109
	128	128	128	128	128	128	128
	155	155	155	155	155	155	155
	222	222	222	222	222	222	222
	54	54	54	54	54	54	54
	183	183	183	183	183	183	183
	102	102	102	102	102	102	102
	1164	1164	1164	1164	1164	1164	1164
	163	163	163	163	163	163	163
	39	39	39	39	39	39	39
	63	63	63	63	63	63	63
	122	122	122	122	122	122	122
	124	124	124	124	124	124	124
	195	195	195	195	195	195	195
	61	61	61	61	61	61	61
	61	61	61	61	61	61	61
	109	109	109	109	109	109	109
	108	108	108	108	108	108	108
	161	161	161	161	161	161	161
	419	419	419	419	419	419	419
	91	91	91	91	91	91	91
	69	69	69	69	69	69	69
	144	144	144	144	144	144	144
	184	184	184	184	184	184	184
	53	53	53	53	53	53	53
	125	125	125	125	125	125	125
	349	349	349	349	349	349	349
	48	48	48	48	48	48	48
	189	189	189	189	189	189	189
	217	217	217	217	217	217	217
	100	100	100	100	100	100	100
	87	87	87	87	87	87	87
	56	56	56	56	56	56	56
	59	59	59	59	59	59	59
	60	60	60	60	60	60	60
	57	57	57	57	57	57	57
	179	179	179	179	179	179	179
	143	143	143	143	143	143	143
	64	64	64	64	64	64	64
	109	109	109	109	109	109	109
	113	113	113	113	113	113	113
	102	102	102	102	102	102	102
	136	136	136	136	136	136	136
	48	48	48	48	48	48	48
	107	107	107	107	107	107	107
	104	104	104	104	104	104	104
	30	30	30	30	30	30	30
	232	232	232	232	232	232	232
	207	207	207	207	207	207	207
	364	364	364	364	364	364	364
	43	43	43	43	43	43	43
	66	66	66	66	66	66	66
	14	14	14	14	14	14	14
	54	54	54	54	54	54	54
	96	96	96	96	96	96	96
	403	403	403	403	403	403	403
	36	36	36	36	36	36	36
	80	80	80	80	80	80	80
	57	57	57	57	57	57	57
	150	150	150	150	150	150	150
	72	72	72	72	72	72	72
	77	77	77	77	77	77	77
	144	144	144	144	144	144	144
	185	185	185	185	185	185	185
	224	224	224	224	224	224	224
	154	154	154	154	154	154	154
	50	50	50	50	50	50	50
	34	34	34	34	34	34	34
	41	41	41	41	41	41	41
	118	118	118	118	118	118	118
	185	185	185	185	185	185	185
	44	44	44	44	44	44	44
	69	69	69	69	69	69	69
	71	71	71	71	71	71	71
	97	97	97	97	97	97	97
	115	115	115	115	115	115	115
	18	18	18	18	18	18	18
	475	475	475	475	475	475	475
	184	184	184	184	184	184	184
	251	251	251	251	251	251	251
	95	95	95	95	95	95	95
	90	90	90	90	90	90	90
	37	37	37	37	37	37	37
	78	78	78	78	78	78	78
	93	93	93	93	93	93	93
	147	147	147	147	147	147	147
	413	413	413	413	413	413	413
	136	136	136	136	136	136	136
	110	110	110	110	110	110	110
	130	130	130	130	130	130	130
	122	122	122	122	122	122	122
	377	377	377	377	377	377	377
	97	97	97	97	97	97	97
	33	33	33	33	33	33	33
	70	70	70	70	70	70	70
	52	52	52	52	52	52	52
	42	42	42	42	42	42	42
	94	94	94	94	94	94	94
	71	71	71	71	71	71	71
	39	39	39	39	39	39	39
	143	143	143	143	143	143	143
	72	72	72	72	72	72	72
	308	308	308	308	308	308	308
	160	160	160	160	160	160	160
	47	47	47	47	47	47	47
	62	62	62	62	62	62	62
	323	323	323	323	323	323	323
	42	42	42	42	42	42	42
	162	162	162	162	162	162	162
	268	268	268	268	268	268	268
	99	99	99	99	99	99	99
	146	146	146	146	146	146	146
	378	378	378	378	378	378	378
	64	64	64	64	64	64	64
	77	77	77	77	77	77	77
	157	157	157	157	157	157	157
	63	63	63	63	63	63	63
	65	65	65	65	65	65	65
	70	70	70	70	70	70	70
	52	52	52	52	52	52	52
	62	62	62	62	62	62	62
	166	166	166	166	166	166	166
	63	63	63	63	63	63	63
	488	488	488	488	488	488	488
	60	60	60	60	60	60	60
	46	46	46	46	46	46	46
	48	48	48	48	48	48	48
	63	63	63	63	63	63	63
	89	89	89	89	89	89	89
	32	32	32	32	32	32	32
	232	232	232	232	232	232	232
	62	62	62	62	62	62	62
	53	53	53	53	53	53	53
	145	145	145	145	145	145	145
	126	126	126	126	126	126	126
	181	181	181	181	181	181	181
	128	128	128	128	128	128	128
	8773	8773	8773	8773	8773	8773	8773
	4838	4838	4838	4838	4838	4838	4838
