# Supplementary material for: Identifying neural substrates of competitive interactions and sequence transitions during mechanosensory responses in Drosophila
Source: PLoS Genet. 2020 Feb 14;16(2):e1008589. doi: 10.1371/journal.pgen.1008589 (PMC7173939; doi:10.1371/journal.pgen.1008589)
Supplement: S7 Table — Behavioral probabilities for lines with decreased (24 lines) or increased probabilities (1 line) in multiple actions. (XLSX) [file pgen.1008589.s016.xlsx]

## Sheet: decrease
	crawl	bend	stop	hunch	back	roll	small action
'GMR_16E03_AE_01_UAS_TNT_2_0003'	0.364161	0.203034	0.183417	0.022001	0.0393635	0	0.188023		bend decrease
'GMR_16E07_AE_01_UAS_TNT_2_0003'	0.381657	0.22742	0.0736563	0.0739029	0.0827991	0	0.160565		bend decrease
'GMR_20D06_AE_01_UAS_TNT_2_0003'	0.447616	0.198025	0.0888525	0.0389804	0.0605572	0	0.165968		hunch bend decrease
'GMR_23G11_AE_01_UAS_TNT_2_0003'	0.459495	0.189252	0.0135525	0.0818546	0.0727974	0	0.183049
'GMR_25E05_AE_01_UAS_TNT_2_0003'	0.453537	0.212077	0.055659	0.0550442	0.0600598	0	0.163623
'GMR_27C05_AE_01_UAS_TNT_2_0003'	0.452982	0.21435	0.0325092	0.0351419	0.0587798	0	0.206237		bend decarese
'GMR_29E11_AE_01_UAS_TNT_2_0003'	0.431357	0.16134	0.0157616	0.117628	0.0946545	0	0.17926		decrease in hunch
'GMR_31E06_AE_01_UAS_TNT_2_0003'	0.422246	0.208554	0.030001	0.0914045	0.0615333	0	0.186261		bend decrease
'GMR_31E11_AE_01_UAS_TNT_2_0003'	0.302002	0.126188	0.117113	0.100115	0.10206	0	0.252521		decrease in hunch 0.04
'GMR_33A07_AE_01_UAS_TNT_2_0003'	0.395995	0.220284	0.0652455	0.0691214	0.0568475	0	0.192506		bend decrease
'GMR_36B06_AE_01_UAS_TNT_2_0003'	0.445341	0.153044	0.0323934	0.22236	0.0207379	0	0.126124		decrease in back
'GMR_36F08_AE_01_UAS_TNT_2_0003'	0.383891	0.221006	0.0162268	0.100579	0.059838	0	0.218458		bend decarese
'GMR_37F03_AE_01_UAS_TNT_2_0003'	0.36808	0.19524	0.0934254	0.0746548	0.0463511	0	0.222249		bend decarese
'GMR_40A07_AE_01_UAS_TNT_2_0003'	0.453428	0.208242	0.0497907	0.0702773	0.0538462	0	0.164417		bend decarese
GMR_45D11_AE_01_UAS_TNT_2_0003'	0.485895	0.230783	0.0259773	0.0679148	0.0267988	0	0.162631		back, bend decrease
GMR_39F05_AE_01_UAS_TNT_2_0003'	0.521368	0.191239	0.0117521	0.0202991	0.100427	0	0.154915		bend decarese
'GMR_47A09_AE_01_UAS_TNT_2_0003'	0.332794	0.218094	0.042735	0.109099	0.0802423	0	0.217036		bend decarese
'GMR_49H10_AE_01_UAS_TNT_2_0003'	0.508454	0.161557	0.0471634	0.0485879	0.0579091	0	0.176329
'GMR_64E03_AE_01_UAS_TNT_2_0003'	0.47998	0.105687	0.0598948	0.0511506	0.0807692	0	0.222518
'GMR_72G06_AE_01_UAS_TNT_2_0003'	0.612783	0.209247	0.0759012	0.015236	0.0178682	0	0.0689644		back, bend decrease
'GMR_76A04_AE_01_UAS_TNT_2_0003'	0.398268	0.220779	0.0373377	0.0622294	0.0741342	0	0.207251		bend decrease
'GMR_77H12_AE_01_UAS_TNT_2_0003'	0.392663	0.22192	0.0244565	0.0720109	0.0778986	0	0.211051		bend decrease
'GMR_84B09_AE_01_UAS_TNT_2_0003'	0.452055	0.216742	0.02254	0.094364	0.0659133	0	0.148386		bend decrease
'GMR_85B01_AE_01_UAS_TNT_2_0003'	0.440785	0.297909	0.0113854	0.0432772	0.0334386	0	0.173204		back decrease
'GMR_87G02_AE_01_UAS_TNT_2_0003'	0.423077	0.266827	0.00600962	0	0.110577	0	0.19351

## Sheet: increase
'GMR_15B07_AE_01_UAS_TNT_2_0003'	0.176997	0.240358	0.0144628	0.285813	0.153581	0	0.128788
